# Supplementary material for: Investigation on photopolymerization of PEGDA to fabricate high-aspect-ratio microneedles
Source: Royal Society of Chemistry journal article supplement (doi:10.1039/d2ra00189f), 2022-01-01
Supplement: d2ra00189f1.pdf [file d2ra00189f1.pdf]

## Supplementary Information

### Investigation on Photopolymerization of PEGDA to Fabricate High-Aspect-Ratio Microneedles

Sohyun Kim,<sup>a†</sup> Hyemin Lee,<sup>b†</sup> Hyewon Choi,<sup>b</sup> Kee-Youn Yoo<sup>\*b</sup> and Hyunsik Yoon<sup>\*ab</sup>

<sup>a</sup>Department of Nano Bio Engineering, Seoul National University of Science and Technology, Seoul, 01811, Republic of Korea

<sup>b</sup>Department of Chemical & Biomolecular Engineering, Seoul National University of Science and Technology, Seoul, 01811, Republic of Korea Email: hsyoon@seoultech.ac.kr and kyyoo@seoultech.ac.kr

† These authors contributed equally to this work.

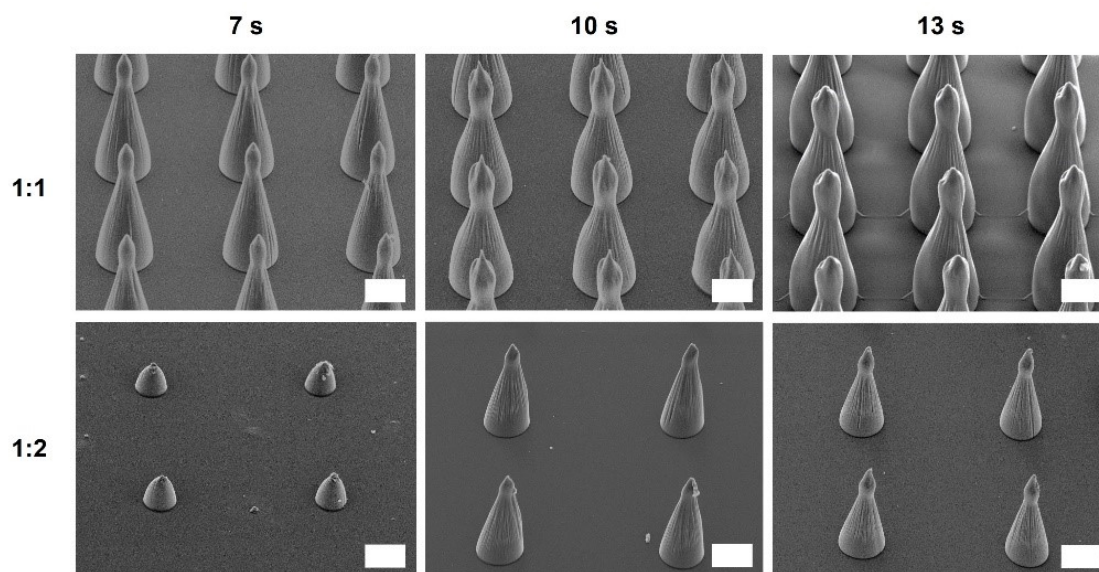

Figure S1. SEM images of MNs according to the spacing ratio between MNs and UV exposure time. Scale bar = 100  $\mu\text{m}$ .
